# Supplementary material for: The impact of race and age on response to neoadjuvant therapy and long-term outcomes in Black and White women with early-stage breast cancer
Source: Springer Nature journal article supplement (doi:10.1007/s10549-023-06943-x), 2023-04-29
Supplement: MOESM1 [file 25299884]

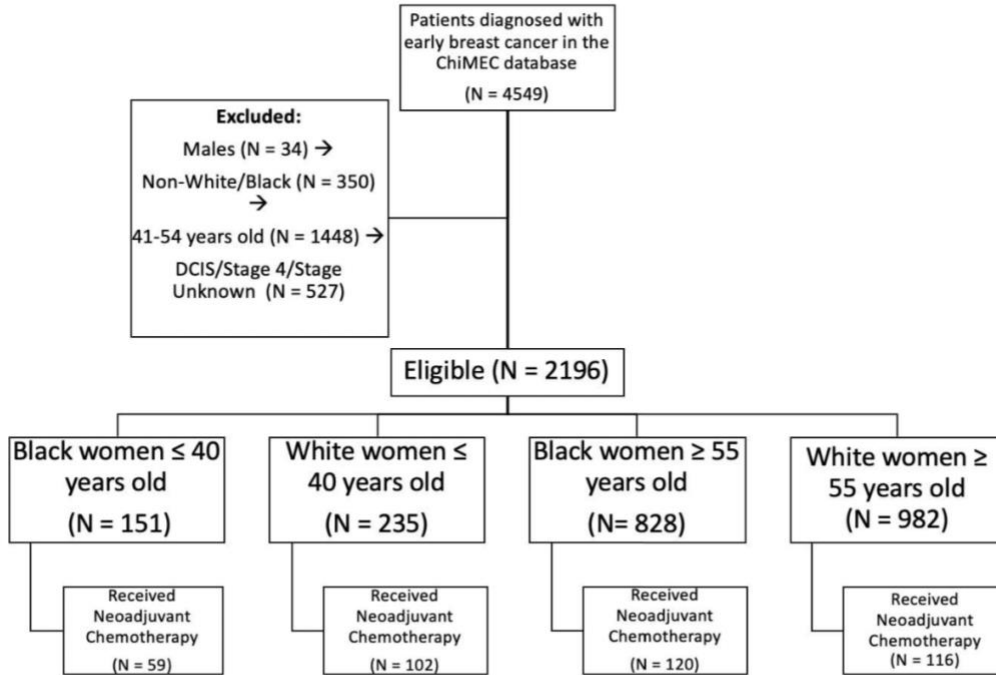

**Suppl Fig. S1** A Consolidated Standards of Reporting Trials (CONSORT) diagram showing exclusion criteria and the four focus populations of the study

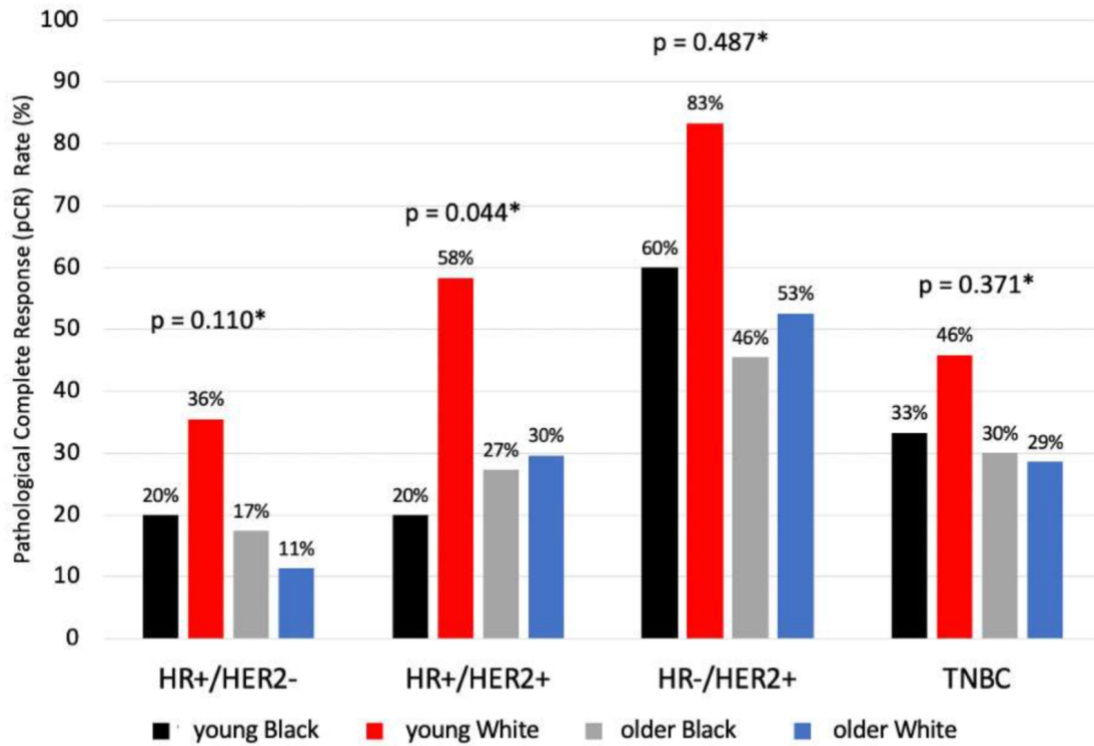

**Suppl Fig. S2** Graph of pathological complete response rate amongst women receiving neoadjuvant chemotherapy stratified by subtype of breast cancer and age/racial groups

Abbreviations: pCR, pathological complete response; HER2, human epidermal growth factor receptor 2; HR, hormone receptor; TNBC, triple negative breast cancer

\*p values from Chi-Squared test comparing age/racial groups within subtypes

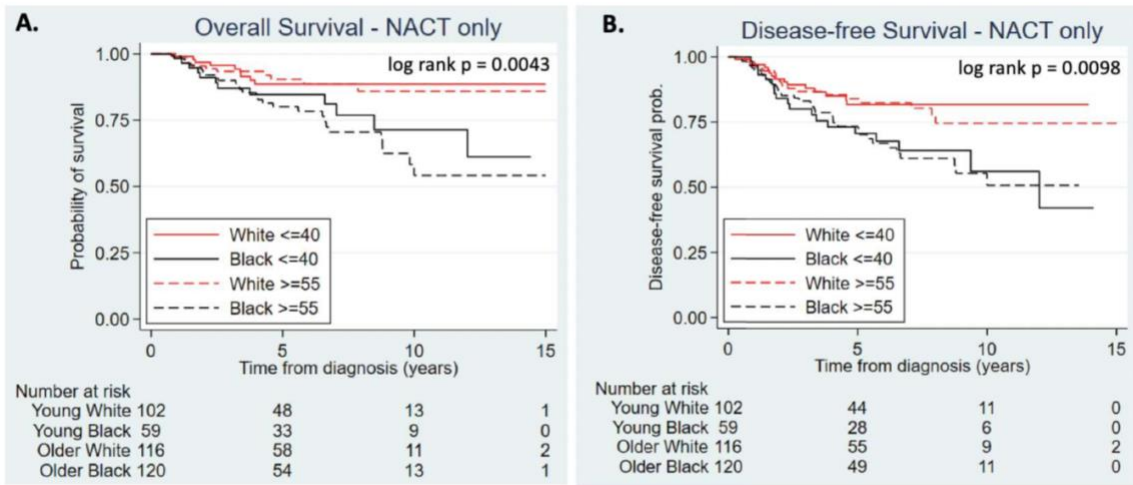

**Suppl Fig. S3** Kaplan-Meier survival curves of **a)** overall survival and **b)** disease-free survival by race and age in patients receiving neoadjuvant chemotherapy

Abbreviations: NACT, neoadjuvant chemotherapy

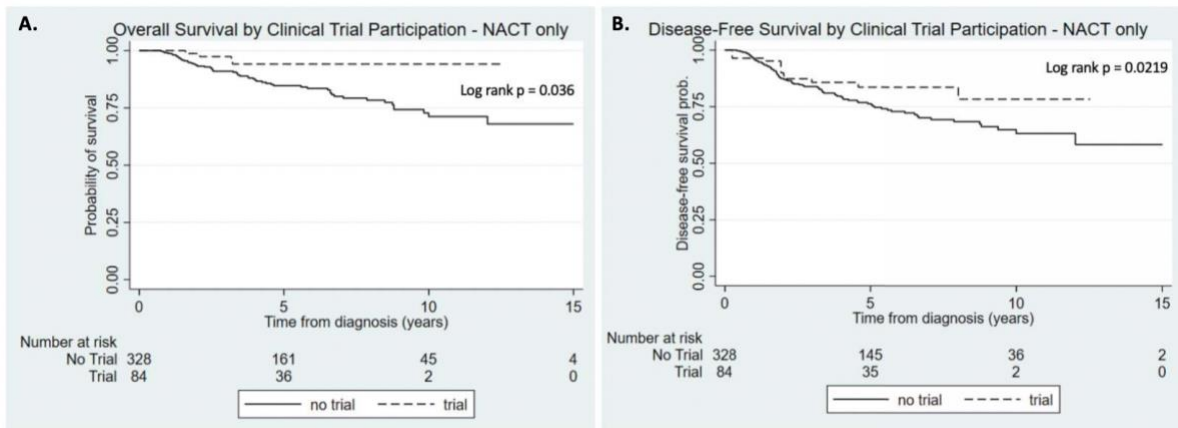

**Suppl Fig. S4** Kaplan-Meier survival curves of **a)** overall survival and **b)** disease-free survival by clinical trial involvement for patients receiving neoadjuvant chemotherapy

Abbreviations: NACT, neoadjuvant chemotherapy

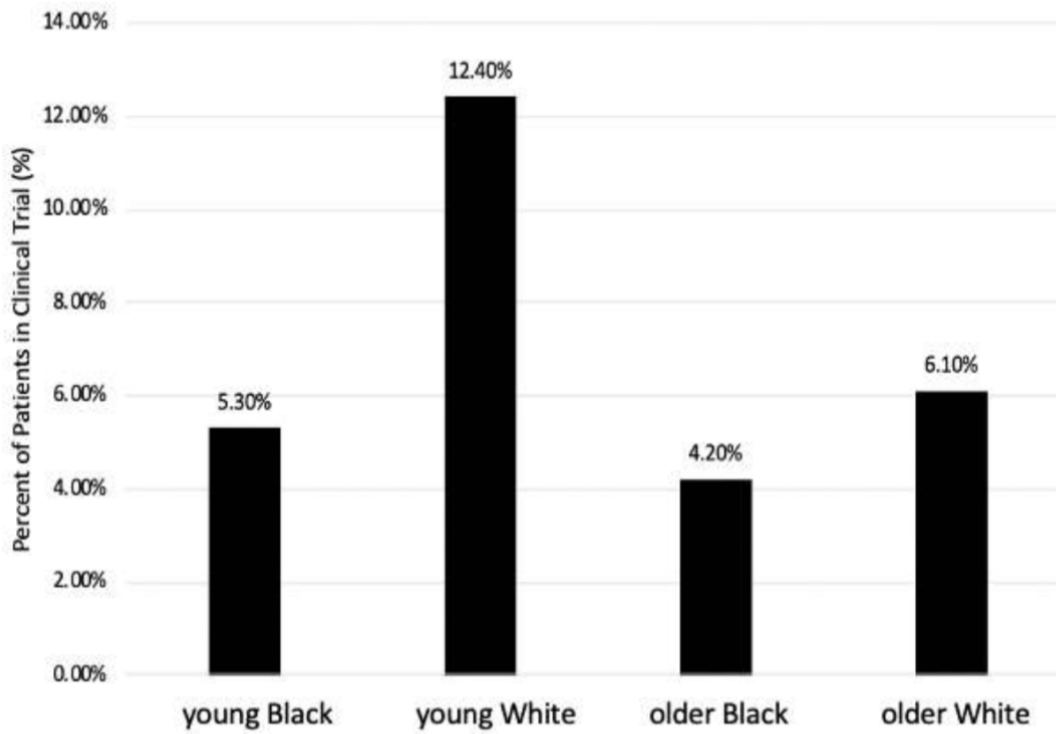

**Suppl Fig. S5** Graph of rates of trial enrollment amongst all women with early-stage cancer between age and racial groups,  $P < 0.05$  (Chi-squared test)

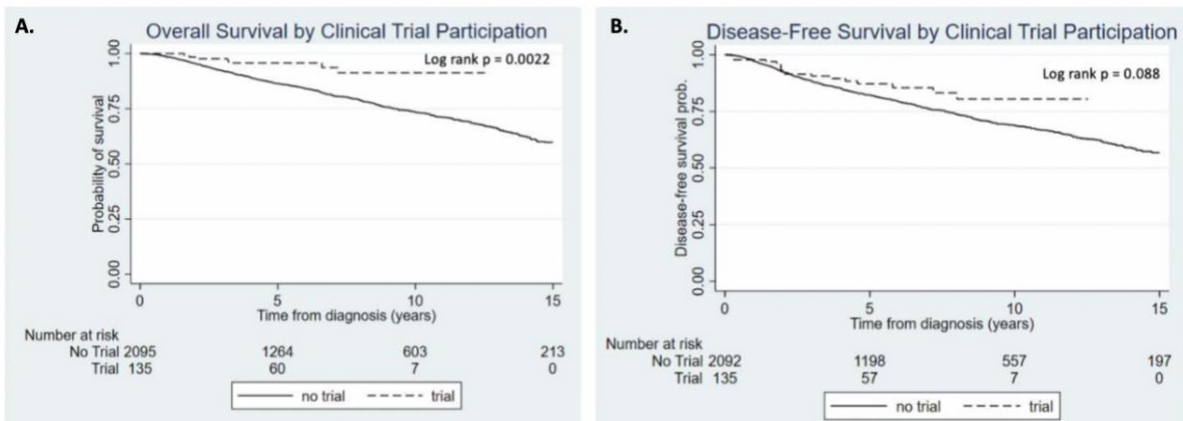

**Suppl Fig. S6** Kaplan-Meier survival curves of a) overall survival and b) disease-free survival by clinical trial involvement
